# Supplementary material for: Participatory flood vulnerability assessment: a multi-criteria approach
Source: Copernicus journal article supplement (doi:10.5194/hess-2017-368), 2017-07-20

Table S1: Characteristics of experts

| Characteristic                                                 | Delphi 1 <sup>st</sup><br>round n (%) | Delphi 2 <sup>nd</sup><br>round n (%) | 1 <sup>st</sup> focus group<br>n (%) | 2 <sup>nd</sup> focus group<br>n (%) | Workshops n<br>(%) |
|----------------------------------------------------------------|---------------------------------------|---------------------------------------|--------------------------------------|--------------------------------------|--------------------|
| <i>Work affiliation*</i>                                       |                                       |                                       |                                      |                                      |                    |
| Academy                                                        | 57 (56.4)                             | 43 (44.3)                             | 6 (60.0)                             | 4 (66.7)                             | 13 (48.1)          |
| Government organizations                                       | 32 (31.7)                             | 27 (27.8)                             | 1 (10.0)                             | 0 (0.0)                              | 8 (29.6)           |
| Research institutes                                            | 21 (20.8)                             | 19 (19.6)                             | 1 (10.0)                             | 1 (16.7)                             | 4 (14.8)           |
| Business/industry                                              | 9 (8.9)                               | 6 (6.2)                               | 1 (10.0)                             | 0 (0.0)                              | 1 (3.7)            |
| NGO                                                            | 3 (3.0)                               | 2 (2.1)                               | 1 (10.0)                             | 1 (16.7)                             | 1 (3.7)            |
| <i>Gender identity</i>                                         |                                       |                                       |                                      |                                      |                    |
| Male                                                           | 54 (53.6)                             | 44 (55.0)                             | 2 (22.3)                             | 2 (40.0)                             | 8 (36.4)           |
| Female                                                         | 47 (46.5)                             | 36 (45.0)                             | 7 (77.7)                             | 3 (60.0)                             | 14 (63.6)          |
| <i>Education level</i>                                         |                                       |                                       |                                      |                                      |                    |
| Ph.D.                                                          | 56 (55.4)                             | 44 (55.0)                             | 3 (20.0)                             | 4 (80.0)                             | 11 (50.0)          |
| Master                                                         | 35 (34.6)                             | 28 (35.0)                             | 4 (26.7)                             | 1 (20.0)                             | 8 (36.4)           |
| Bachelor                                                       | 4 (4.0)                               | 3 (3.7)                               | 1 (6.7)                              | 0 (0.0)                              | 2 (9.1)            |
| M.B.A.                                                         | 4 (4.0)                               | 4 (5.0)                               | 0 (0.0)                              | 0 (0.0)                              | 0 (0.0)            |
| High school                                                    | 2 (2.0)                               | 1 (1.3)                               | 1 (6.7)                              | 0 (0.0)                              | 1 (4.5)            |
| <i>Profession*</i>                                             |                                       |                                       |                                      |                                      |                    |
| Geography                                                      | 27 (26.5)                             | 21 (25.9)                             | 0 (0.0)                              | 0 (0.0)                              | 5 (21.7)           |
| Engineering                                                    | 25 (24.5)                             | 20 (24.7)                             | 3 (18.8)                             | 4 (66.7)                             | 5 (21.7)           |
| Geology                                                        | 20 (19.6)                             | 16 (19.8)                             | 0 (0.0)                              | 0 (0.0)                              | 2 (8.7)            |
| Others                                                         | 8 (7.8)                               | 8 (9.9)                               | 3 (18.8)                             | 0 (0.0)                              | 5 (21.7)           |
| Architecture                                                   | 5 (4.9)                               | 4 (4.9)                               | 2 (12.5)                             | 1 (16.7)                             | 3 (13.0)           |
| Law                                                            | 5 (4.9)                               | 2 (2.5)                               | 0 (0.0)                              | 0 (0.0)                              | 0 (0.0)            |
| Social sciences and service                                    | 4 (3.9)                               | 2 (2.5)                               | 1 (6.3)                              | 1 (16.7)                             | 3 (13.0)           |
| Biology                                                        | 3 (2.9)                               | 3 (3.7)                               | 0 (0.0)                              | 0 (0.0)                              | 0 (0.0)            |
| Economy                                                        | 3 (2.9)                               | 3 (3.7)                               | 0 (0.0)                              | 0 (0.0)                              | 0 (0.0)            |
| Meteorology                                                    | 2 (2.0)                               | 2 (2.5)                               | 0 (0.0)                              | 0 (0.0)                              | 0 (0.0)            |
| <i>Self-reported knowledge of flood vulnerability analysis</i> |                                       |                                       |                                      |                                      |                    |
| Limited                                                        | 0 (0.0)                               | 0 (0.0)                               | 0 (0.0)                              | 0 (0.0)                              | 0 (0.0)            |
| Reasonable                                                     | 43 (42.6)                             | 31 (38.8)                             | 3 (33.3)                             | 2 (40.0)                             | 11 (50.0)          |
| Very good                                                      | 58 (57.4)                             | 49 (61.3)                             | 6 (66.7)                             | 3 (60.0)                             | 11 (50.0)          |
| <b>Total no. of participants</b>                               | <b>101</b>                            | <b>80</b>                             | <b>9</b>                             | <b>5</b>                             | <b>22</b>          |

\*The participants could select more than one work affiliation and profession. Only the professions that were mentioned twice are shown here. The remaining was grouped in the 'others' category.

Figure S1: Individual vulnerability maps

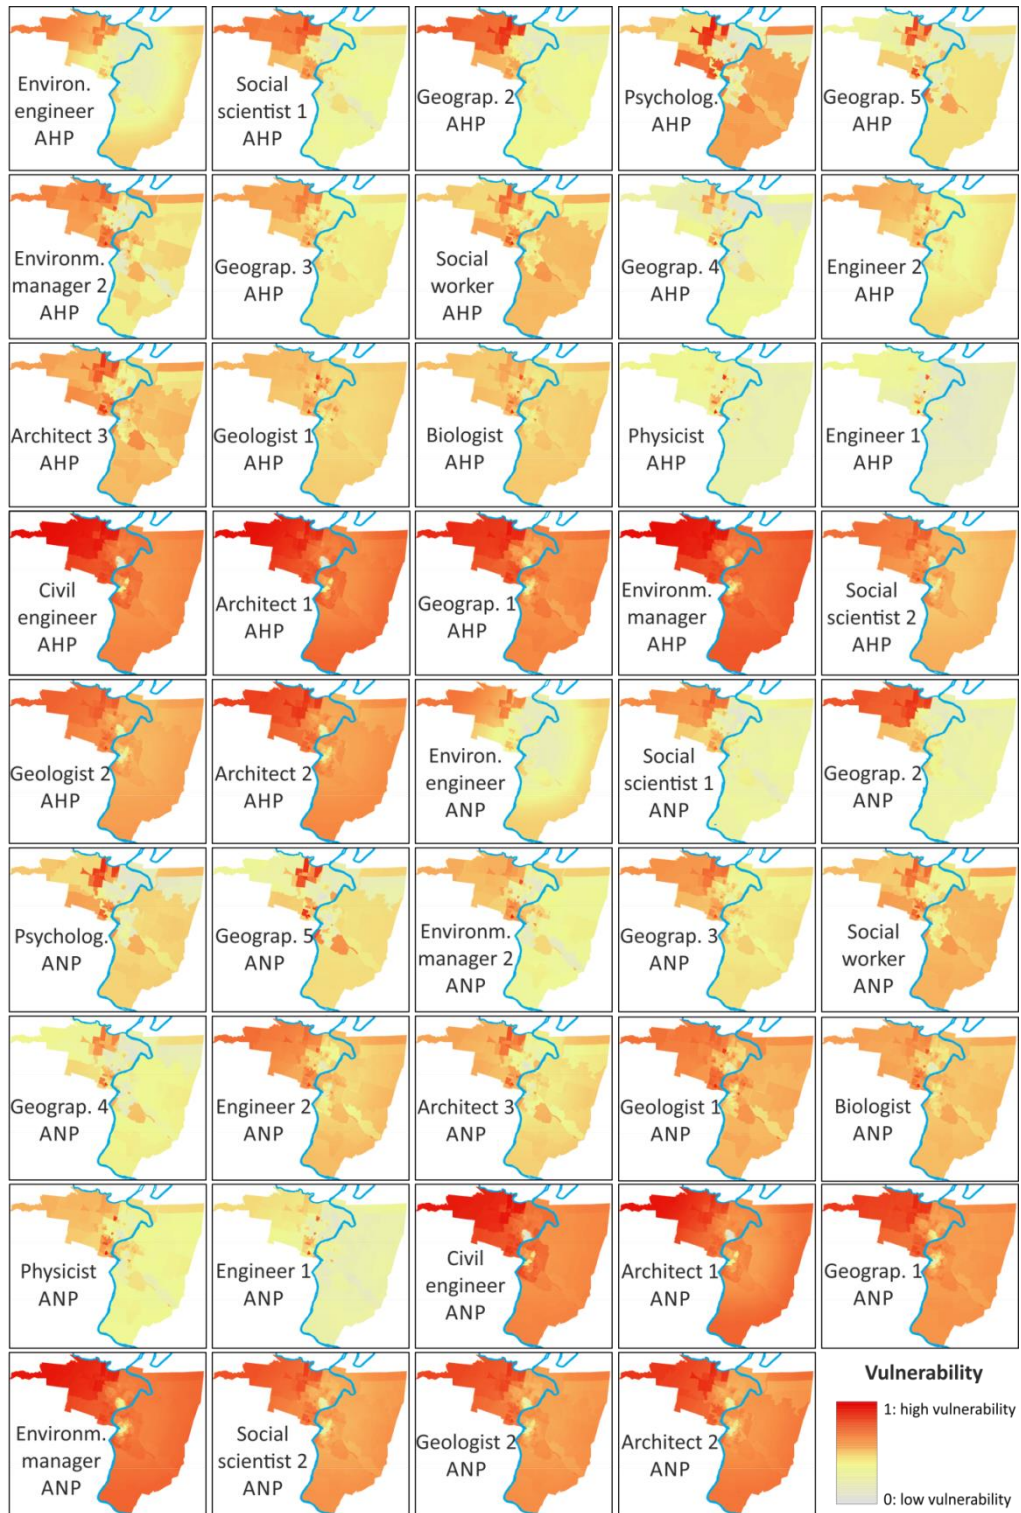

Supplement: Supplementary file 1 [file hess-2017-368-supplement.pdf]
